# Supplementary material for: Cytogenetic and Biochemical Genetic Techniques for Personalized Drug Therapy in Europe
Source: MDPI journal article supplement (doi:10.3390/diagnostics11071169), 2021-06-26
Supplement: s1 [file s1]

# Cytogenetic and Biochemical Genetic Techniques for Personalized Drug Therapy in Europe

Tatjana Huebner\*, Catharina Scholl and Michael Steffens

<sup>1</sup> Research Division, Federal Institute for Drugs and Medical Devices, 53175 Bonn, North Rhine-Westphalia, Germany; Catharina.Scholl@bfarm-research.de (C.S.); Michael.Steffens@bfarm-research.de (M.S.)

\* Correspondence: Tatjana.Huebner@bfarm-research.de

**Supplementary Material 1.** GTR-registered tests of the category “Cytogenetics” screened by biomarker (testing required or recommended prior to prescription of the respective drug)

| Drug                | Disease                                                       | Gene/Biomarker                                                           | Cytogenetics                                                                                                                                                                                  |
|---------------------|---------------------------------------------------------------|--------------------------------------------------------------------------|-----------------------------------------------------------------------------------------------------------------------------------------------------------------------------------------------|
| Abacavir            | HIV infection                                                 | HLA-B*5701                                                               | -                                                                                                                                                                                             |
| Abemaciclib         | Breast cancer                                                 | Hormone receptor positive (PGR, ESR1, ESR2), HER2 negative (ERBB2)       | ERBB2: Fluorescence in situ hybridization                                                                                                                                                     |
| Afatinib            | Lung cancer                                                   | EGFR                                                                     | Fluorescence in situ hybridization<br>Fluorescence In Situ Hybridization, RT-PCR with gel analysis (Cytogenetics)+ Molecular genetics: Allele-specific primer extension (ASPE)                |
| Alectinib           | Lung cancer                                                   | Anaplastic Lymphoma Kinase (ALK)                                         | (Applied Biosystems™ 7900HT Sequence Detection System) (Molecular genetics), Fluorescence In Situ Hybridization Molecular genetics: Next-Generation (NGS)/Massively parallel sequencing (MPS) |
| Arsenic trioxide    | Acute promyelocytic leukaemia                                 | t(15;17) translocation, PML/RAR-alpha (PML (15q24.1), RARA (17q21.2))    | t(15;17) translocation: G-banding PML/RAR-alpha: Fluorescence in situ hybridization (FISH)                                                                                                    |
| Atazanavir          | HIV infection                                                 | CYP2C19 *2,*3 or other star alleles related to decreased enzyme function | -                                                                                                                                                                                             |
| Atezolizumab        | Urothelial cancer, lung cancer, triple-negative breast cancer | PD-L1                                                                    | Fluorescence in situ hybridization (FISH)                                                                                                                                                     |
| Binimetinib         | Melanoma                                                      | BRAF-V600 Mutation                                                       | -                                                                                                                                                                                             |
| Bosutinib           | Chronic myelogenous leukaemia                                 | Philadelphia-Chromosome                                                  | Fluorescence in situ hybridization (FISH), FISH (M)+G-banding, G-banding                                                                                                                      |
| Brentuximab vedotin | Hodgkin lymphoma and anaplastic large cell lymphoma           | TNFRSF8                                                                  | -                                                                                                                                                                                             |
| Brigatinib          | Lung cancer                                                   | ALK                                                                      | Fluorescence In Situ Hybridization, RT-PCR with gel analysis (Cytogenetics)+ Molecular genetics:                                                                                              |

|                         |                                                                                                                                                                                                                                                                                                                                             |                                                                             |                                                                                                                                                                                                                                                                                                                                              |
|-------------------------|---------------------------------------------------------------------------------------------------------------------------------------------------------------------------------------------------------------------------------------------------------------------------------------------------------------------------------------------|-----------------------------------------------------------------------------|----------------------------------------------------------------------------------------------------------------------------------------------------------------------------------------------------------------------------------------------------------------------------------------------------------------------------------------------|
|                         |                                                                                                                                                                                                                                                                                                                                             |                                                                             | Allele-specific primer extension (ASPE)<br>(Applied Biosystems 7900HT Sequence Detection System), Fluorescence In Situ Hybridization+Molecular genetics: Next-Generation (NGS)/Massively parallel sequencing (MPS)                                                                                                                           |
| <b>Capecitabine</b>     | Colorectal Neoplasms                                                                                                                                                                                                                                                                                                                        | DPYD (including DPYD*2A, c.1679T>G, c.2846A>T and c.1236G>A/HapB3 variants) | -                                                                                                                                                                                                                                                                                                                                            |
| <b>Carglumic acid</b>   | Hyperammonaemia                                                                                                                                                                                                                                                                                                                             | NAGS                                                                        | -                                                                                                                                                                                                                                                                                                                                            |
| <b>Ceritinib</b>        | Lung cancer                                                                                                                                                                                                                                                                                                                                 | Anaplastic Lymphoma Kinase                                                  | Fluorescence In Situ Hybridization, RT-PCR with gel analysis (Cytogenetics)+ Allele-specific primer extension (ASPE)<br>(Applied Biosystems 7900™HT Sequence Detection System)<br>(Molecular genetics), Fluorescence In Situ Hybridization<br>((Cytogenetics)+Next-Generation (NGS)/Massively parallel sequencing (MPS) (Molecular genetics) |
| <b>Cerliponase alfa</b> | Neuronal ceroid lipofuscinosis type 2 (CLN2) disease                                                                                                                                                                                                                                                                                        | TPP1                                                                        | -                                                                                                                                                                                                                                                                                                                                            |
| <b>Cetuximab</b>        | Gastric cancer                                                                                                                                                                                                                                                                                                                              | Kras, Nras                                                                  | Comparative Genomic Hybridization+ Molecular Genetics: Next-Generation (NGS)/Massively parallel sequencing (MPS)                                                                                                                                                                                                                             |
| <b>Cholic acid</b>      | Inborn errors in primary bile acid synthesis due to Sterol 27-hydroxylase (presenting as cerebrotendinous xanthomatosis, CTX) deficiency, 2- (or $\alpha$ -) methylacyl-CoA racemase (AMACR) deficiency or Cholesterol 7 $\alpha$ -hydroxylase (CYP7A1) deficiency in infants, children and adolescents aged 1 month to 18 years and adults | CYP27A1, AMACR and CYP7A1, HSD3B7, AKR1D1                                   | -                                                                                                                                                                                                                                                                                                                                            |
| <b>Cobimetinib</b>      | Melanoma                                                                                                                                                                                                                                                                                                                                    | BRAF V600                                                                   | -                                                                                                                                                                                                                                                                                                                                            |
| <b>Crizotinib</b>       | Lung cancer                                                                                                                                                                                                                                                                                                                                 | ALK, ROS                                                                    | Fluorescence In Situ Hybridization, RT-PCR with gel analysis (Cytogenetics) + Molecular Genetics: Allele-specific primer extension (ASPE)                                                                                                                                                                                                    |

|                        |                                                               |                                                                      |                                                                                                                                                                                                                                                                                                                     |
|------------------------|---------------------------------------------------------------|----------------------------------------------------------------------|---------------------------------------------------------------------------------------------------------------------------------------------------------------------------------------------------------------------------------------------------------------------------------------------------------------------|
|                        |                                                               |                                                                      | (Applied Biosystems™ 7900HT Sequence Detection System), Fluorescence In Situ Hybridization + Molecular Genetics: Next-Generation (NGS)/Massively parallel sequencing (MPS)                                                                                                                                          |
| <b>Dabrafenib</b>      | Melanoma                                                      | BRAF V600                                                            | -                                                                                                                                                                                                                                                                                                                   |
| <b>Dacomitinib</b>     | Lung cancer                                                   | EGFR (ErbB-1)                                                        | Fluorescence in situ hybridization (FISH)                                                                                                                                                                                                                                                                           |
| <b>Dasatinib</b>       | Acute lymphatic leukemia                                      | Philadelphia-chromosome                                              | Fluorescence in situ hybridization (FISH)(M,I), FISH (M)+G-banding, G-banding                                                                                                                                                                                                                                       |
| <b>Eliglustat</b>      | Gaucher's disease                                             | CYP2D6                                                               | -                                                                                                                                                                                                                                                                                                                   |
| <b>Elosulfase alfa</b> | Mucopolysaccharidosis, type IVA (Morquio A Syndrome, MPS IVA) | GALNS                                                                | -                                                                                                                                                                                                                                                                                                                   |
| <b>Encorafenib</b>     | Unresectable or metastatic melanoma                           | BRAF V600                                                            | -                                                                                                                                                                                                                                                                                                                   |
| <b>Erlotinib</b>       | Lung cancer                                                   | EGFR (ErbB-1)                                                        | Fluorescence in situ hybridization (FISH) (F,I),                                                                                                                                                                                                                                                                    |
| <b>Everolimus</b>      | Breast cancer                                                 | ERBB2                                                                | Fluorescence In Situ Hybridization (F, T)                                                                                                                                                                                                                                                                           |
| <b>Fulvestrant</b>     | Breast cancer                                                 | PGR gene residing on chromosome 11q22, ESR1 (6q25.1), ESR2 (14q23.2) | -                                                                                                                                                                                                                                                                                                                   |
| <b>Gefitinib</b>       | Lung cancer                                                   | EGFR (ErbB-1)                                                        | Fluorescence in situ hybridization (FISH) (F,I),<br>17p deletion:                                                                                                                                                                                                                                                   |
|                        |                                                               |                                                                      | Digital / Virtual karyotyping (M)+G-banding+ Molecular genetics: Microarray, G-banding, Fluorescence in situ hybridization +Microarray (e.g., Affymetrix® Cytoscan® HD Array)                                                                                                                                       |
| <b>Ibrutinib</b>       | Chronic lymphocytic leukemia                                  | 17p deletion or TP53 mutation                                        | TP53:<br>Comparative Genomic Hybridization + Molecular Genetics: Next-Generation (NGS)/Massively parallel sequencing (MPS), Fluorescence in situ hybridization (FISH)(F)+G-banding, Fluorescence in situ hybridization (FISH) (I,M,F) (e.g., Affymetrix® GeneChip® Scanner 3000 7G Whole-Genome Association System) |
| <b>Imatinib</b>        | Acute lymphatic and chronic myeloid leukemia                  | Philadelphia-chromosome                                              | Fluorescence in situ hybridization (FISH)(M,I), FISH (M)+G-banding, G-banding                                                                                                                                                                                                                                       |
| <b>Ivacaftor</b>       | Mucoviscidosis                                                | CFTR mutations                                                       | G-banding+ Molecular Genetics:                                                                                                                                                                                                                                                                                      |

|                               |                                                                                                                |                                   |                                                                                                                                                                                                                                                                                                                           |
|-------------------------------|----------------------------------------------------------------------------------------------------------------|-----------------------------------|---------------------------------------------------------------------------------------------------------------------------------------------------------------------------------------------------------------------------------------------------------------------------------------------------------------------------|
|                               |                                                                                                                |                                   | Allele-specific PCR+PCR with allele specific hybridization, G-banding+ Molecular Genetics: PCR+Next-Generation (NGS)/Massively parallel sequencing (MPS)+ Bi-directional Sanger Sequence Analysis                                                                                                                         |
| <b>Lapatinib</b>              | Breast cancer                                                                                                  | HER2 overexpression, ERBB2        | Fluorescence In Situ Hybridization                                                                                                                                                                                                                                                                                        |
| <b>Lomitapid</b>              | Increased cholesterol or fat levels                                                                            | LDLR, APOB and PCSK9              | -                                                                                                                                                                                                                                                                                                                         |
| <b>Lorlatinib</b>             | Non-small cell lung cancer                                                                                     | ALK                               | Fluorescence In Situ Hybridization (T,I), RT-PCR with gel analysis (Cytogenetics)+ Molecular Genetics: Allele-specific primer extension (ASPE) (Applied Biosystems™ 7900HT Sequence Detection System), Fluorescence In Situ Hybridization + Molecular Genetics: Next-Generation (NGS)/Massively parallel sequencing (MPS) |
| <b>Lumacaftor / Ivacaftor</b> | Cystic fibrosis                                                                                                | F508del mutation in the CFTR gene | -                                                                                                                                                                                                                                                                                                                         |
| <b>Midostaurin</b>            | Acute myeloid leukaemia                                                                                        | FLT3                              | Comparative Genomic Hybridization)+ Molecular Genetics: Next-Generation (NGS)/Massively parallel sequencing (MPS)                                                                                                                                                                                                         |
| <b>Migalastat</b>             | Fabry disease                                                                                                  | GLA                               | -                                                                                                                                                                                                                                                                                                                         |
| <b>Neratinib</b>              | Breast cancer                                                                                                  | HER2/ERBB2                        | Fluorescence In Situ Hybridization                                                                                                                                                                                                                                                                                        |
| <b>Nilotinib</b>              | Chronic myeloid leukaemia                                                                                      | Philadelphia-chromosome           | Fluorescence in situ hybridization (FISH)(M,I), FISH (M)+G-banding, G-banding                                                                                                                                                                                                                                             |
| <b>Olaparib</b>               | Ovarian Cancer                                                                                                 | BRCA1/2                           | -                                                                                                                                                                                                                                                                                                                         |
| <b>Osimertinib</b>            | Non-small cell lung cancer (NSCLC)                                                                             | EGFR (ErbB-1) T790M               | Fluorescence in situ hybridization (FISH)                                                                                                                                                                                                                                                                                 |
| <b>Palbociclib</b>            | HR-positive, HER2-negative locally advanced or metastatic breast cancer                                        | PGR, ESR1, ESR2, ERBB2            | ERBB2: Fluorescent in situ hybridization                                                                                                                                                                                                                                                                                  |
| <b>Panitumumab</b>            | Colon Cancer                                                                                                   | RAS                               | -                                                                                                                                                                                                                                                                                                                         |
| <b>Pembrolizumab</b>          | Non-small cell lung carcinoma (NSCLC)<br>Head and neck squamous cell carcinoma (HNSCC)<br>Urothelial carcinoma | PD-L1                             | Fluorescence in situ hybridization (FISH) (F,T)                                                                                                                                                                                                                                                                           |
| <b>Pertuzumab</b>             | Breast cancer                                                                                                  | ERBB2                             | Fluorescent in situ hybridization (I, T, F)                                                                                                                                                                                                                                                                               |
| <b>Ponatinib</b>              | Chronic myeloid leukaemia (CML)                                                                                | Philadelphia chromosome           | Fluorescence in situ hybridization (FISH)(M,I), FISH (M)+G-banding, G-banding                                                                                                                                                                                                                                             |
| <b>Ribociclib</b>             | Breast cancer,                                                                                                 | PGR, ESR1, ESR2, ERBB2            | ERBB2: Fluorescent in situ                                                                                                                                                                                                                                                                                                |

|                                   |                                                                                                                                      |               |                                                                                                                                                                                                                                                                                         |
|-----------------------------------|--------------------------------------------------------------------------------------------------------------------------------------|---------------|-----------------------------------------------------------------------------------------------------------------------------------------------------------------------------------------------------------------------------------------------------------------------------------------|
|                                   | HR-positive,<br>HER2-negative                                                                                                        |               | hybridization (I,F)                                                                                                                                                                                                                                                                     |
| <b>Rituximab</b>                  | CD20-positive diffuse<br>large V cell<br>non-Hodgkin's<br>lymphoma                                                                   | MS4A1         | -                                                                                                                                                                                                                                                                                       |
| <b>Rucaparib</b>                  | Relapsed or progressive<br>epithelial ovarian cancer<br>(EOC), fallopian tube<br>cancer (FTC), or primary<br>peritoneal cancer (PPC) | BRCA          | -                                                                                                                                                                                                                                                                                       |
| <b>Talazoparib</b>                | Breast cancer                                                                                                                        | BRCA1/2, HER2 | ERBB2: Fluorescent in situ<br>hybridization                                                                                                                                                                                                                                             |
| <b>Tezacaftor /<br/>Ivacaftor</b> | Cystic fibrosis                                                                                                                      | F508del, CTFR | -                                                                                                                                                                                                                                                                                       |
| <b>Trametinib</b>                 | Melanoma, Non-small<br>cell lung cancer<br>(NSCLC)                                                                                   | BRAF V600     | -                                                                                                                                                                                                                                                                                       |
| <b>Trastuzumab</b>                | Breast and gastric cancer                                                                                                            | HER2/ERBB2    | Fluorescence In Situ Hybridization<br>(I,F)                                                                                                                                                                                                                                             |
| <b>Trastuzumab<br/>emtansin</b>   | Breast cancer                                                                                                                        | HER2/ERBB2    | Fluorescence In Situ Hybridization<br>(I,F)                                                                                                                                                                                                                                             |
| <b>Vandetanib</b>                 | Medullary thyroid<br>cancer (MTC)                                                                                                    | RET           | Fluorescence In Situ Hybridization,<br>Fluorescence in situ hybridization<br>(FISH)+ Molecular Genetics:<br>Next-Generation (NGS)/Massively<br>parallel sequencing (MPS)+<br>Biochemical Genetics: Protein<br>Expression (PD-L1) (e.g., NeoTYPE®<br>Discovery Profile for Solid Tumors) |
| <b>Velaglucerase alfa</b>         | Type 1 Gaucher disease                                                                                                               | GBA           | -                                                                                                                                                                                                                                                                                       |
| <b>Vemurafenib</b>                | Melanoma                                                                                                                             | BRAF V600     | -                                                                                                                                                                                                                                                                                       |

M: Metaphase, I: Interphase, F: Fluorescence In Situ Hybridization, T: Targeted variant analysis.

**Supplementary Material 2.** GTR-registered tests of the category “Cytogenetics” and “Biochemical Genetics” by biomarker (drugs with annotations on actionable pharmacogenomics in the drug label provided by the respective EPAR).

| Drug                                                    | Disease                                                                                                                               | Gene/Biomarker                                                 | Cytogenetics | Biochemical Genetics                                                                                                                                                                                                            |
|---------------------------------------------------------|---------------------------------------------------------------------------------------------------------------------------------------|----------------------------------------------------------------|--------------|---------------------------------------------------------------------------------------------------------------------------------------------------------------------------------------------------------------------------------|
| <b>Amifampridine Phosphate</b>                          | Lambert–Eaton myasthenic syndrome                                                                                                     | NAT2                                                           | -            | -                                                                                                                                                                                                                               |
| <b>Aripiprazole</b>                                     | Schizophrenia                                                                                                                         | CYP2D6                                                         | -            | -                                                                                                                                                                                                                               |
| <b>Brexpiprazole</b>                                    | Schizophrenia                                                                                                                         | CYP2D6                                                         | -            | -                                                                                                                                                                                                                               |
| <b>Brivaracetam</b>                                     | Epilepsy                                                                                                                              | CYP2C19 (poor metabolism)                                      | -            | -                                                                                                                                                                                                                               |
| <b>Clopidogrel</b>                                      | Secondary prevention of atherothrombotic events, Prevention of atherothrombotic and thromboembolic events in atrial fibrillation      | CYP2C19 intermediate or poor metabolism                        | -            | -                                                                                                                                                                                                                               |
| <b>Darifenacin (hydrobromide)</b>                       | Urge incontinence and/or increased urinary frequency and urgency as may occur in adult patients with overactive bladder syndrome      | CYP2D6 (poor metabolism)                                       | -            | -                                                                                                                                                                                                                               |
| <b>Dolutegravir</b>                                     | HIV infection                                                                                                                         | UGT1A1 (poor dolutegravir metabolism)                          | -            | -                                                                                                                                                                                                                               |
| <b>Duloxetine</b>                                       | Treatment of major depressive disorder. Treatment of diabetic peripheral neuropathic pain. Treatment of generalised anxiety disorder. | CYP2D6                                                         | -            | -                                                                                                                                                                                                                               |
| <b>Efavirenz</b>                                        | HIV infection                                                                                                                         | Homozygous G516T genetic variant of the CYP2B6 isoenzyme       | -            | -                                                                                                                                                                                                                               |
| <b>Efavirenz / Emtricitabine / Eenofovir Disoproxil</b> | HIV infection                                                                                                                         | Homozygous G516T genetic variant of the CYP2B6 isoenzyme       | -            | -                                                                                                                                                                                                                               |
| <b>Eltrombopag</b>                                      | Chronic immune (idiopathic) thrombocytopenic purpura (ITP)                                                                            | Factor V Leiden (F5 gene) and ATIII deficiency (SERPINC1 gene) | -            | F5: Electromagnetic Clot Detection/Quantitative Enzymatic (Analyte)+ Molecular Genetics: Polymerase Chain Reaction/Fluorescence Monitoring, Clotting (A)+ Molecular Genetics: Polymerase Chain Reaction/Fluorescence Monitoring |
| <b>Erlotinib</b>                                        | Non-small-cell lung cancer (NSCLC)                                                                                                    | UGT1A1                                                         | -            | -                                                                                                                                                                                                                               |

|                                           |                                                                            |                                                                                                                                                                |   |   |
|-------------------------------------------|----------------------------------------------------------------------------|----------------------------------------------------------------------------------------------------------------------------------------------------------------|---|---|
| <b>Ethinyl estradiol / norelgestromin</b> | Female contraception                                                       | Predisposition for venous thromboembolism (including F5), antithrombin-III deficiency (SERPINC1), protein C deficiency (PROC) and protein S deficiency (PROS)) | - | - |
| <b>Fesoterodine</b>                       | Treatment of the symptoms that may occur with overactive bladder syndrome. | CYP2D6 (poor metabolisers)                                                                                                                                     | - | - |
| <b>Gefitinib</b>                          | Advanced or metastatic non-small cell lung cancer                          | CYP2D6 (poor metabolism)                                                                                                                                       | - | - |
| <b>Glibenclamide</b>                      | Neonatal diabetes mellitus                                                 | G6PD (deficiency)                                                                                                                                              | - | - |
| <b>Glimepiride</b>                        | Type 2 diabetes mellitus                                                   | G6PD (deficiency)                                                                                                                                              | - | - |
| <b>Irinotecan</b>                         | Metastatic adenocarcinoma of the pancreas                                  | Homozygosity for UGT1A1*28 allele                                                                                                                              | - | - |
| <b>Lapatinib</b>                          | Breast cancer, whose tumours overexpress HER2 (ErbB2)                      | HLA-DQA1*02:01 and HLA-DRB1*07:01                                                                                                                              | - | - |
| <b>Lesinurad</b>                          | Hyperuricaemia in gout patients                                            | CYP2C9 (poor metabolism)                                                                                                                                       | - | - |
| <b>Lidocaine / Prilocaine</b>             | Primary premature ejaculation                                              | G6PD                                                                                                                                                           | - | - |
| <b>Mercaptopurine</b>                     | Acute lymphoblastic leukaemia (ALL)                                        | TPMT, NUDT15                                                                                                                                                   | - | - |
| <b>Methylene blue</b>                     | Medicinal and chemical products-induced methaemoglobinaemia                | G6PD, NADPH deficiency                                                                                                                                         | - | - |
| <b>Pazopanib</b>                          | Advanced renal cell carcinoma                                              | HLA-B                                                                                                                                                          | - | - |
| <b>Pioglitazone</b>                       | Type 2 diabetes mellitus                                                   | G6PD                                                                                                                                                           | - | - |
| <b>Pioglitazone</b>                       | Stable angina pectoris                                                     | CYP2D6                                                                                                                                                         | - | - |
| <b>Ranolazine</b>                         | Stable angina pectoris                                                     | CYP2D6 (poor metabolism)                                                                                                                                       | - | - |
| <b>Rasburicase</b>                        | Acute hyperuricaemia                                                       | G6PD                                                                                                                                                           | - | - |
| <b>Regorafenib</b>                        | Metastatic colorectal cancer                                               | KRAS                                                                                                                                                           | - | - |
| <b>Ticagrelor</b>                         | Prevention of atherothrombotic events                                      | CYP2C19 (loss of function allele)                                                                                                                              | - | - |
| <b>Toremifen</b>                          | Hormone-dependent metastatic breast cancer                                 | ESR1 and ESR2                                                                                                                                                  | - | - |
| <b>Vortioxetine</b>                       | Major depressive episodes                                                  | CYP2D6 (poor metabolism, ultra-rapid metabolism)                                                                                                               | - | - |

**Supplementary Material 3.** GTR-registered tests of the category “Biochemical Genetics” screened by biomarker (testing required or recommended prior to prescription of the respective drug)

| Drug                    | Disease                                                         | Gene/Biomarker                                                              | Biochemical Genetics                                                                                                                                                                                                                                                                                                                              |
|-------------------------|-----------------------------------------------------------------|-----------------------------------------------------------------------------|---------------------------------------------------------------------------------------------------------------------------------------------------------------------------------------------------------------------------------------------------------------------------------------------------------------------------------------------------|
| <b>Alectinib</b>        | Lung cancer                                                     | ALK                                                                         | Immunohistochemistry for ALK and ROS fusion proteins(I)+ Molecular Genetics: Pyrosequencing                                                                                                                                                                                                                                                       |
| <b>Atezolizumab</b>     | Urothelial cancer, lung cancer, triple-negative breast cancer   | PD-L1                                                                       | Immunohistochemistry                                                                                                                                                                                                                                                                                                                              |
| <b>Brigatinib</b>       | Lung cancer                                                     | ALK                                                                         | Immunohistochemistry for ALK and ROS fusion proteins(I)+ Molecular Genetics: Pyrosequencing                                                                                                                                                                                                                                                       |
| <b>Capecitabine</b>     | Colorectal Neoplasms                                            | DPYD (including DPYD*2A, c.1679T>G, c.2846A>T and c.1236G>A/HapB3 variants) | Gas chromatography–mass spectrometry (GC-MS) (Analyte analysis) (A), Metabolite analysis (A) + Enzyme diagnostics(E) + Molecular Genetics: Bi-directional Sanger Sequence Analysis                                                                                                                                                                |
| <b>Carglumic acid</b>   | Hyperammonaemia                                                 | NAGS                                                                        | Metabolite levels (A) + Bi-directional Sanger Sequence Analysis(C) (Molecular Genetics), Enzymatic levels (E)+ Molecular Genetics: Multiplex Ligation-dependent Probe Amplification (MLPA) + Trinucleotide repeat by PCR or Southern Blot +Bi-directional Sanger Sequence Analysis+ Next-Generation (NGS)/Massively parallel sequencing (MPS) (C) |
| <b>Ceritinib</b>        | Lung cancer                                                     | Anaplastic Lymphoma Kinase                                                  | Immunohistochemistry for ALK and ROS fusion proteins(I)+Pyrosequencing                                                                                                                                                                                                                                                                            |
| <b>Cerliponase alfa</b> | Neuronal ceroid lipofuscinosis type 2 (CLN2) disease            | TPP1                                                                        | Enzyme activity(E)+ Molecular Genetics: Bi-directional Sanger Sequence Analysis(C) Fluorometry (E)                                                                                                                                                                                                                                                |
| <b>Ivacaftor</b>        | Mucoviscidosis (cystic fibrosis)                                | CFTR mutations                                                              | Enzyme activity+Molecular genetics: PCR with allele specific hybridization, Enzymatic levels+Molecular genetics: Next-Generation (NGS)/Massively parallel sequencing (MPS),Enzymatic levels+Molecular genetics: Next-Generation (NGS)/Massively parallel sequencing (MPS)+Trinucleotide repeat by PCR or Southern Blot                            |
| <b>Lorlatinib</b>       | Non-small cell lung cancer                                      | ALK                                                                         | Immunohistochemistry for ALK and ROS fusion proteins(I) + Molecular Genetics: Pyrosequencing                                                                                                                                                                                                                                                      |
| <b>Migalastat</b>       | Fabry disease                                                   | GLA                                                                         | Enzyme activity (E), Enzyme activity (E) + Molecular Genetics: Bi-directional Sanger Sequence Analysis (e.g., Applied Biosystems™ 3500xL capillary sequencing instrument)                                                                                                                                                                         |
| <b>Pembrolizumab</b>    | Non-small cell lung carcinoma (NSCLC)<br>Head and neck squamous | PD-L1                                                                       | Immunohistochemistry (I), Protein expression (I) Antibodies, conjugates, and chromogens (I)                                                                                                                                                                                                                                                       |



|                           |                        |     |                                           |
|---------------------------|------------------------|-----|-------------------------------------------|
| cell carcinoma (HNSCC)    |                        |     |                                           |
| Urothelial carcinoma      |                        |     |                                           |
| <b>Velaglycerase alfa</b> | Type 1 Gaucher disease | GBA | Enzyme activity                           |
|                           |                        |     | Fluorometry (Enzymes:beta-Glucosidase)    |
|                           |                        |     | (E)+ Molecular Genetics: Bi-directional   |
|                           |                        |     | Sanger Sequence Analysis +PCR / RFLP,     |
|                           |                        |     | Enzymatic levels (E),                     |
|                           |                        |     | Fluorometry (E)+Bi-directional Sanger     |
|                           |                        |     | Sequence Analysis+PCR / RFLP              |
|                           |                        |     | (Molecular Genetics)                      |
|                           |                        |     | Enzyme activity (E)+Bi-directional Sanger |
|                           |                        |     | Sequence Analysis (Molecular Genetics)    |

I: Immunohistochemistry, A: Analyte, E: Enzyme assay, A: Analyte analysis, C: Sequence analysis of the entire coding region.
